# Supplementary material
Source: PubMed Central journal article supplement (PMC327192)

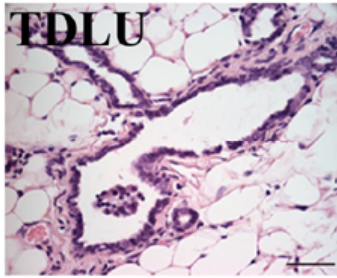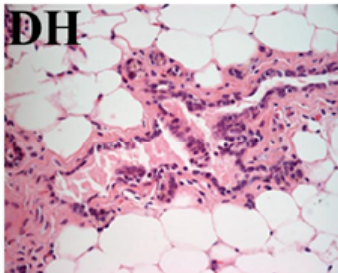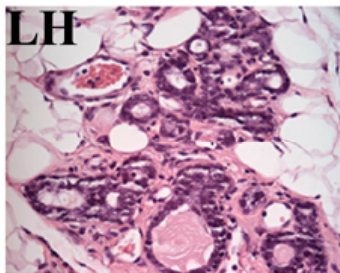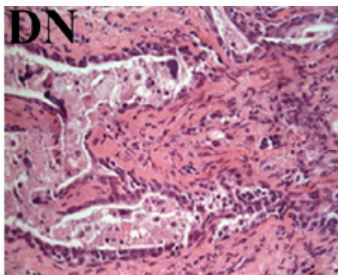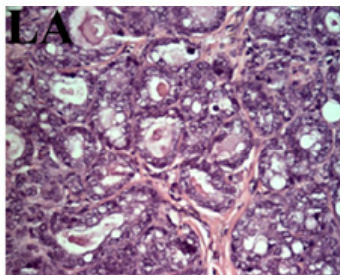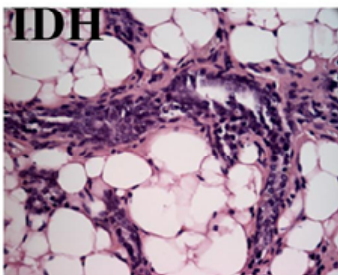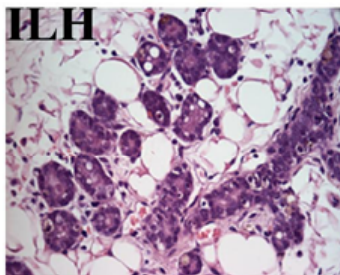

Supplement: pnas_2535911100_2.pdf [file pnas_2535911100_2.pdf]

**A**

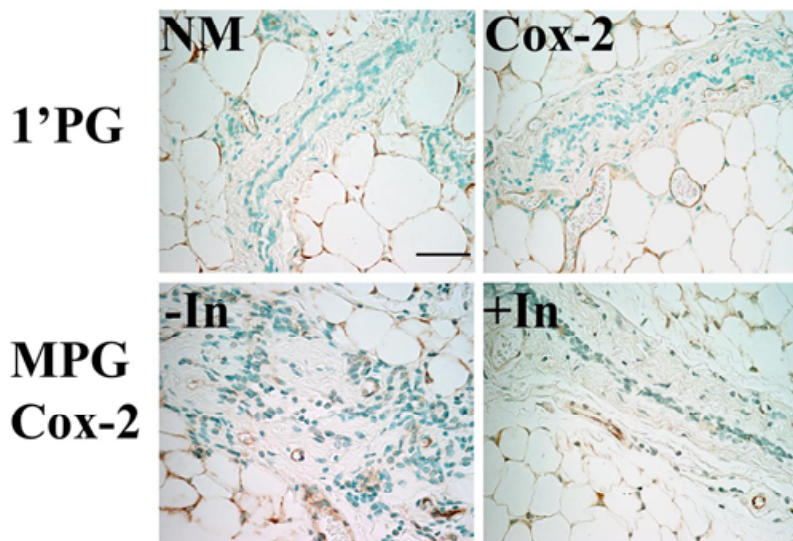

**B**

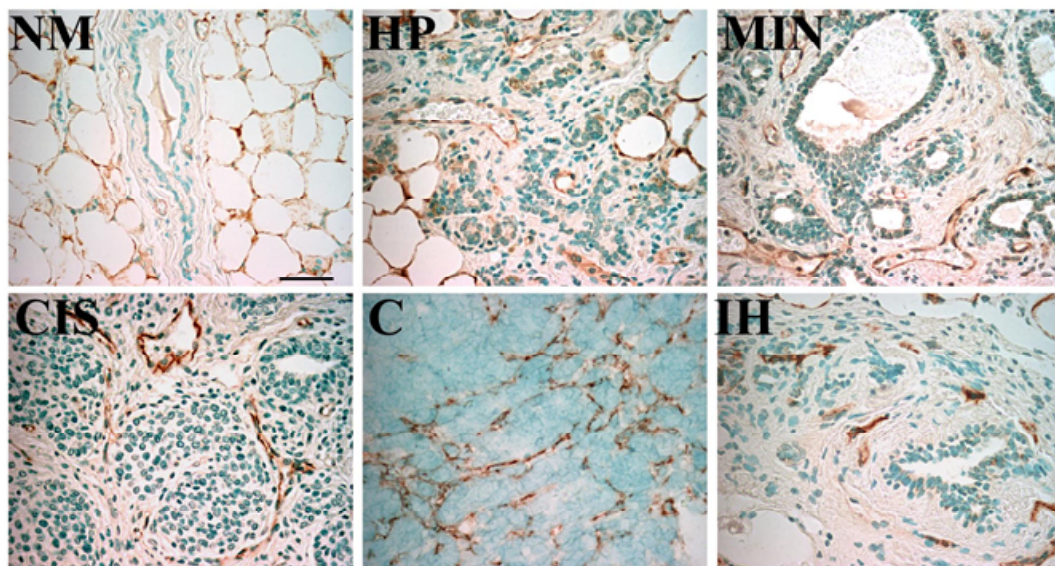

Supplement: pnas_2535911100_4.pdf [file pnas_2535911100_4.pdf]
